# Supplementary material for: Seroconversion and Kinetics of Vibriocidal Antibodies during the First 90 Days of Re-Vaccination with Oral Cholera Vaccine in an Endemic Population
Source: MDPI journal article supplement (doi:10.3390/vaccines12040390), 2024-04-08
Supplement: s1 [file s1]

## Ogawa

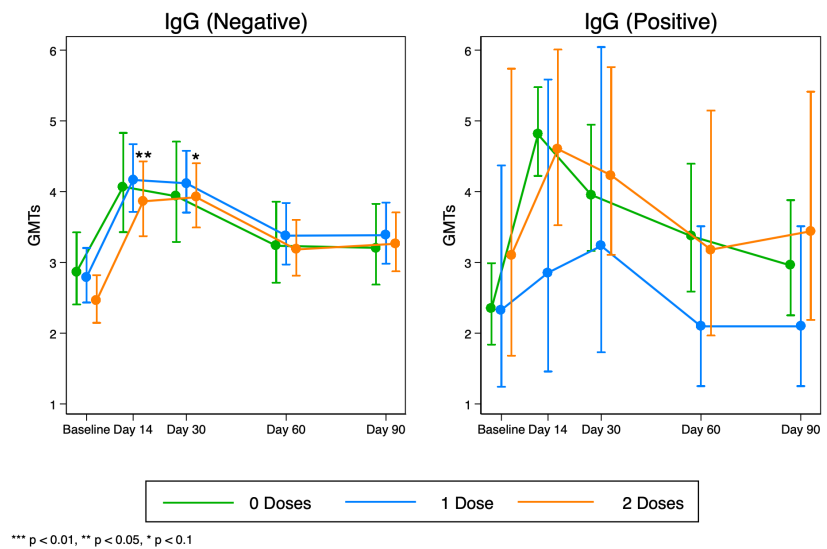

**Figure S1.** Shows vibriocidal geometric mean antibody titres to Ogawa in participants with high (positive) or lower (negative) baseline IgG antibodies across treatment arms.

## Inaba

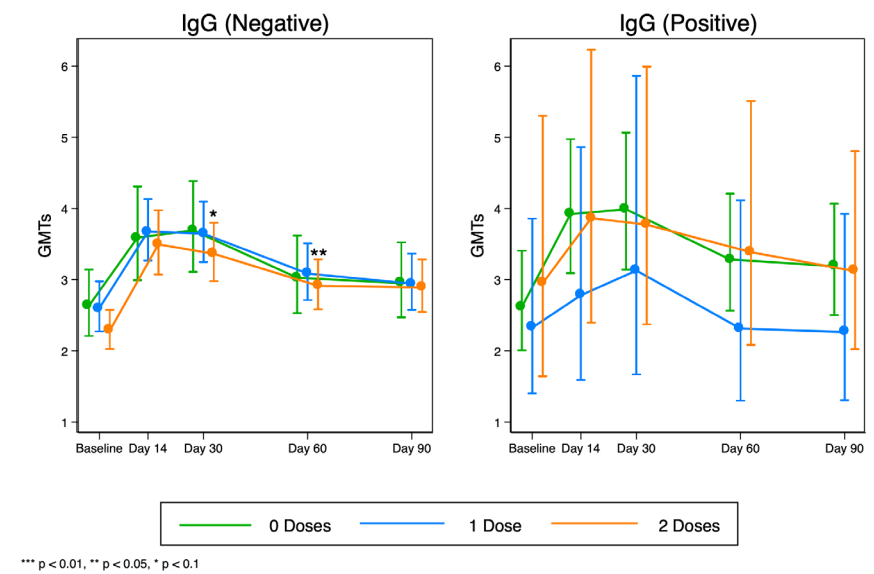

**Figure S2.** Shows vibriocidal geometric mean antibody titres to Inaba in participants with high (positive) or lower (negative) baseline IgG antibodies across treatment arms.

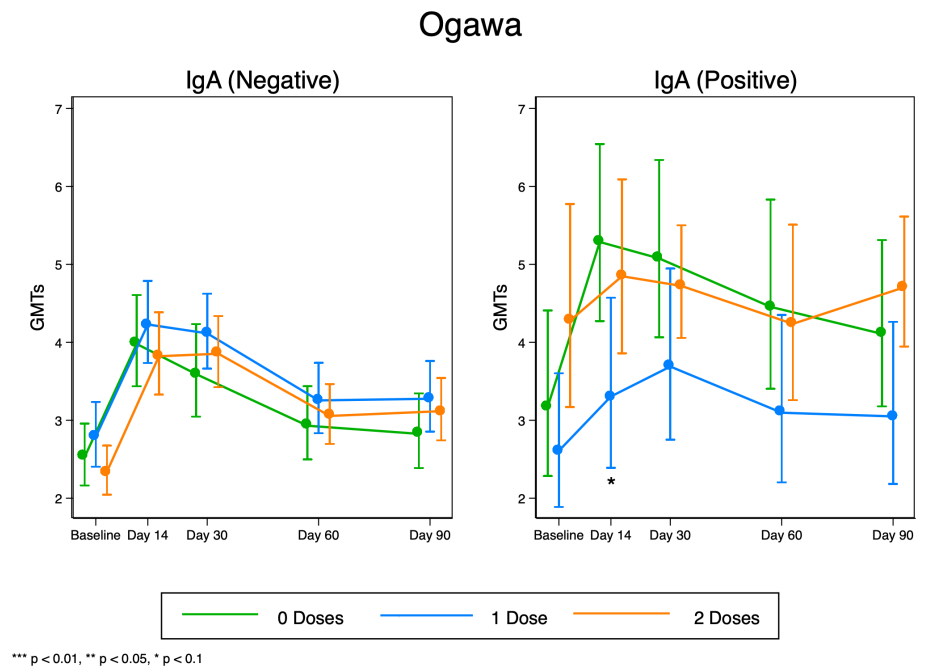

**Figure S3.** Shows vibriocidal geometric mean antibody titres to Ogawa in participants with high (positive) or lower (negative) baseline IgA antibodies across treatment arms.

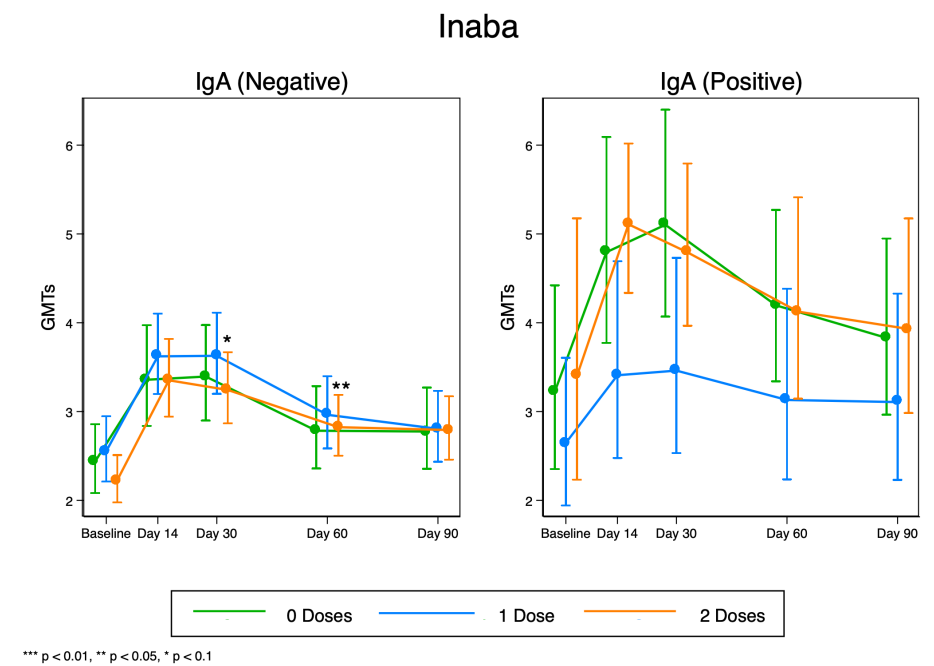

**Figure S4.** Shows vibriocidal geometric mean antibody titres to Inaba in participants with high (positive) or lower (negative) baseline IgA antibodies across treatment arms.

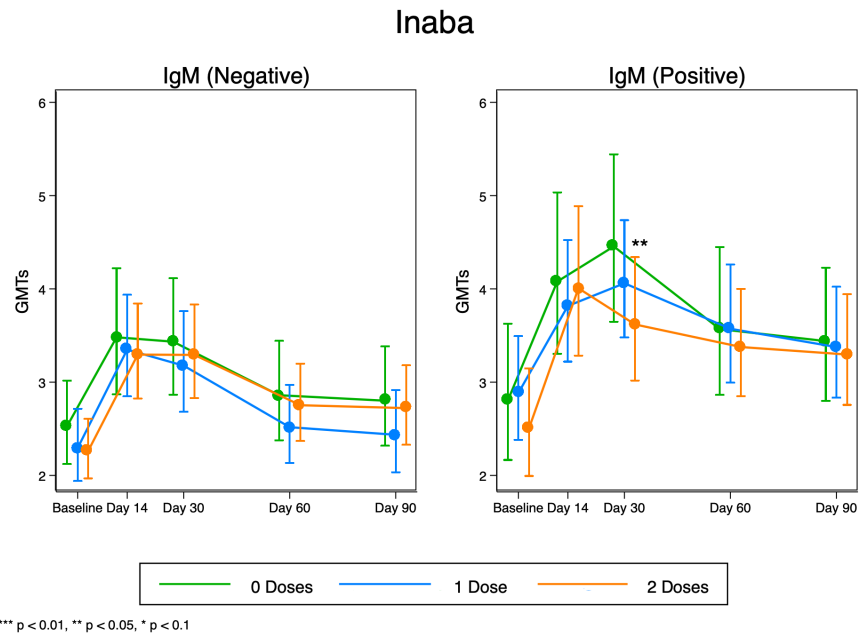

**Figure S5.** Shows vibriocidal geometric mean antibody titres to serotype Inaba in participants with high (positive) or lower (negative) baseline IgM antibodies across treatment arms.

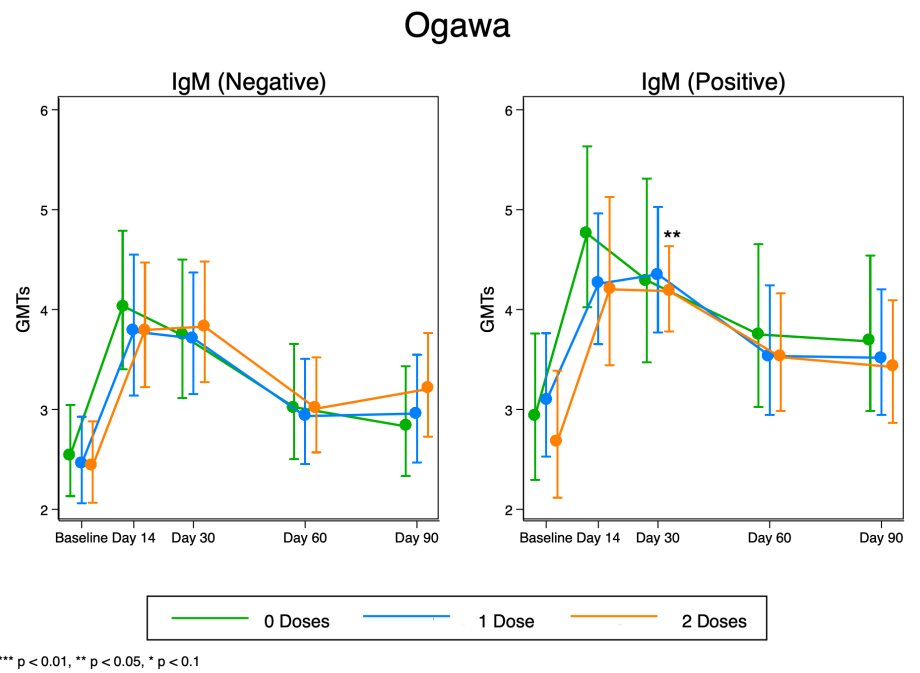

**Figure S6.** Shows vibriocidal geometric mean antibody titres to Ogawa in participants with high (positive) or lower (negative) baseline IgM antibodies across treatment arms.

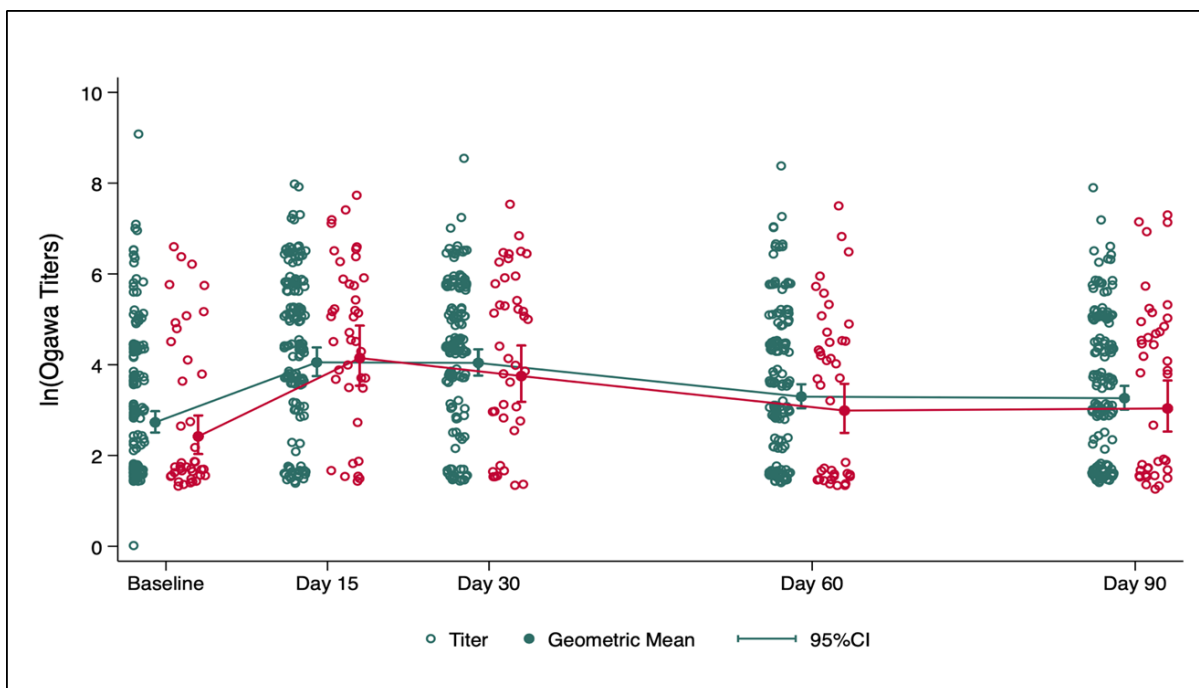

**Figure S7.** Ogawa titers kinetics by HIV status. Emerald (HIV-), Red (HIV+).

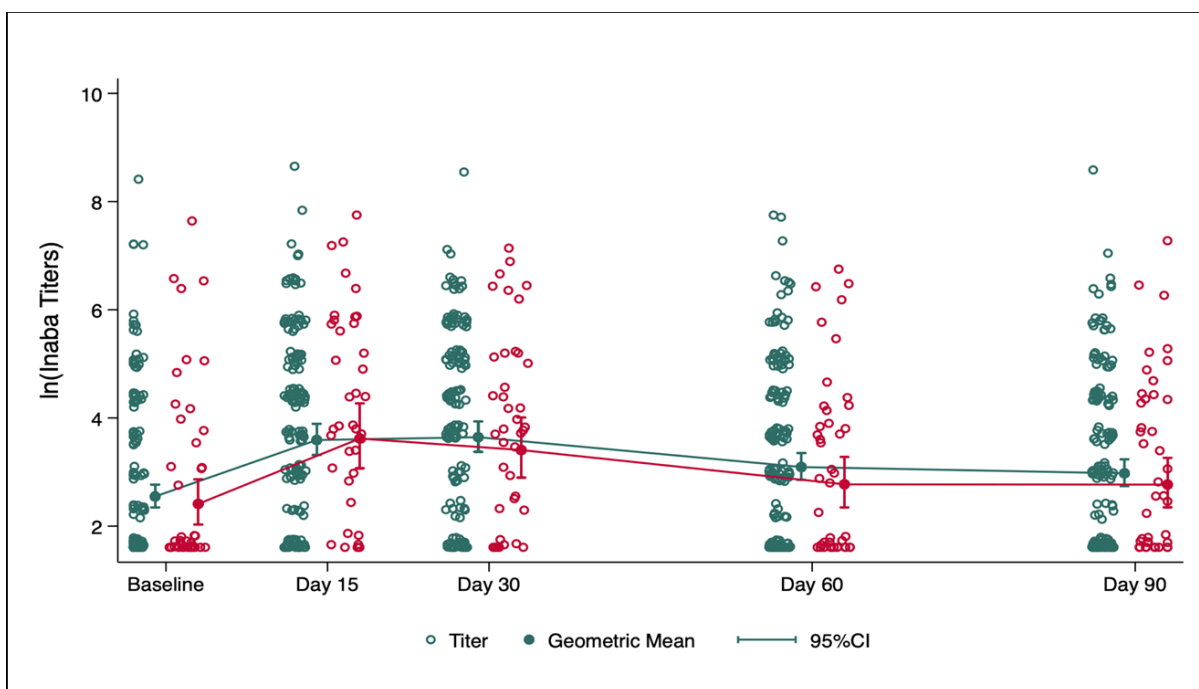

**Figure S8.** Inaba titers kinetics by HIV status. Emerald (HIV-), Red (HIV+).
